# Supplementary material for: Prognostic significance of mean platelet volume in lung cancer patients: A meta-analysis
Source: Research Square preprint supplement (doi:10.21203/rs.3.rs-678719/v1), 2021-07-19
Supplement: Supplementary file 1 [file dbb2732fa39f621a211522f4.docx]

**Supplementary information**

**PubMed**

#1: "Mean Platelet Volume"[Mesh] OR "MPV"

#2: (("Lung Neoplasms"[Mesh]) OR "Carcinoma, Non-Small-Cell Lung"[Mesh]) OR "Carcinoma, Small Cell"[Mesh] OR "lung cancer"

#3: #1 AND #2

**Search Strategy:**

("Mean Platelet Volume"[MeSH Terms] OR "MPV"[All Fields]) AND ("Lung Neoplasms"[MeSH Terms] OR "carcinoma, non-small cell lung"[MeSH Terms] OR "carcinoma, small cell"[MeSH Terms] OR "lung cancer"[All Fields])

Filters: English, Human studies

Total results: 31
